# Supplementary material for: Naturally existing isoforms of miR-222 have distinct functions
Source: PubMed Central journal article supplement — Nucleic Acids Res. 2017 Sep 11;45(19):11371–85. doi: 10.1093/nar/gkx788 (PMC5737821; doi:10.1093/nar/gkx788), 2017-09-11
Supplement: gkx788_supp.pdf [file gkx788_supp.pdf]

**Supplementary Figure 1:** MCF10A cells are visualized by immunofluorescence of  $\beta$ -tubulin (green) and phalloidin staining of  $\beta$ -actin (red) 72 hours after transfection with miR-222, miR-222CUCU or the 21 and 25nt negative controls (nc21 and nc25). DAPI (blue) was used to stain nuclei.

**Supplementary Figure 2:** MCF10A cells are shown 72hr after the transfection of the 21 or 25nt controls (nc21 and nc25) or miR-222 isomiRs as indicated.

**Supplementary Figure 3:** Relative luciferase activity was measured for miR-222 target gene 3'UTR reporters as Figure 3f. miR-222 isomiRs or negative controls were transfected as indicated.

**Supplementary Figure 4:** MCF10A cells were transfected by single-stranded miRNA mimics of miR-222, miR-222CUCU or the 21nt and 25nt negative controls and visualised 72 hours post-transfection.

**Supplementary Figure 5:** The most significantly enriched ontologies of genes that were 2-fold up- and down-regulated 48hr after the transfection of control or miR-222 mimics into MCF10A cells.

**Supplementary Figure 6:** Differential expression ratios (top) and EISA analysis (bottom) of PIK3/AKT pathway components. MCF10A cells were transfected with miR-222 or control isomiRs for 48hr (as in Supp.Fig 4) at which time poly(A+) RNA was harvested and subjected to RNA sequencing. Relative expression of total (upper) and EISA-analysed (lower) PI3K/AKT pathway members are shown. Due to insufficient intron-mapping depth, determination of the level of AKT2 inhibition by EISA was not possible.

**Supplementary Figure 7:** Successful fractionation of MCF10A cells as indicated by the exclusive cytoplasmic and nuclear presence of 7SL and 45s rRNA respectively.

**Supplementary Table 1:** The 15 most significantly altered pathways are listed according to the IMPaLA analysis of deep-sequencing results of cells treated by miR-222CUCU in comparison to miR-222.

# Supplementary Figure 1

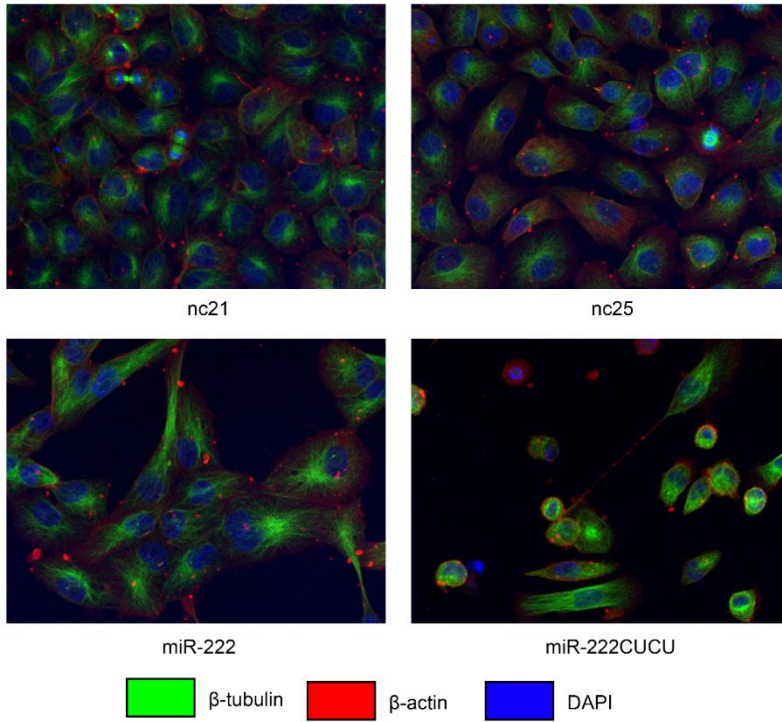

## Supplementary Figure 2

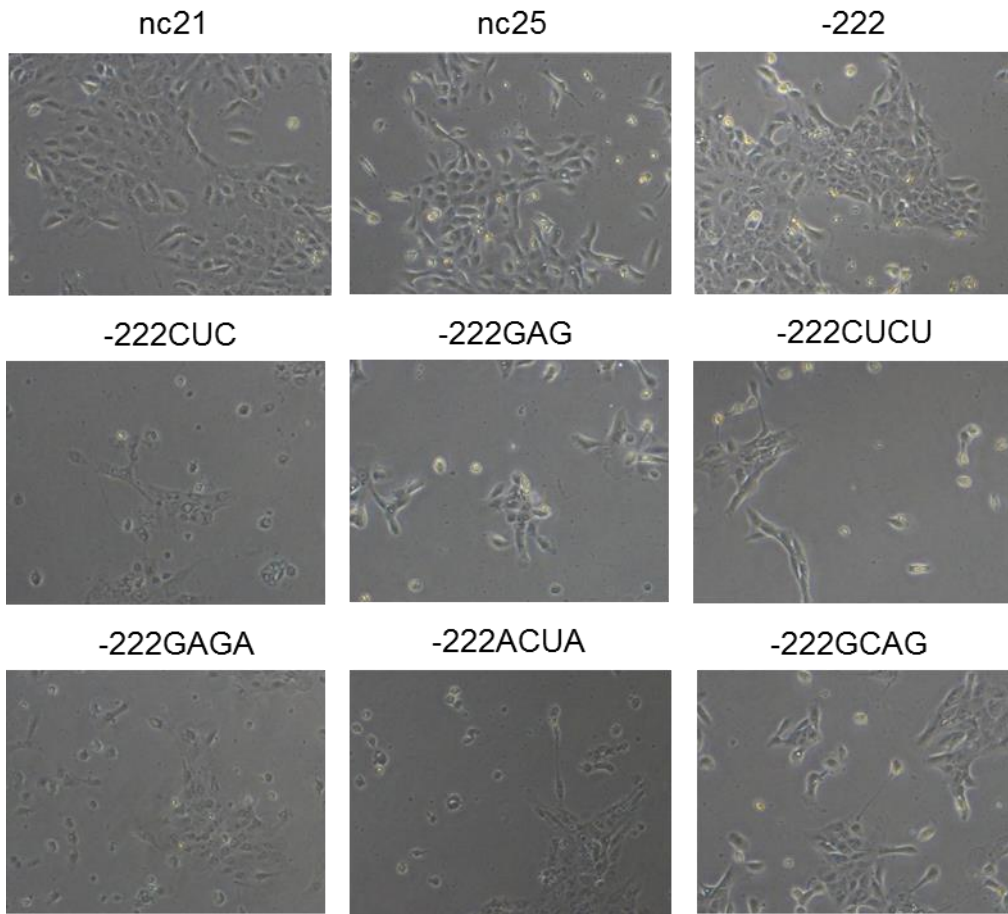

### Supplementary Figure 3

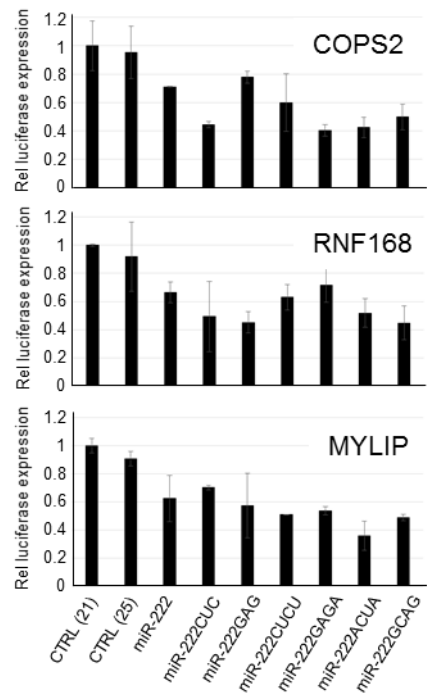

## Supplementary Figure 4

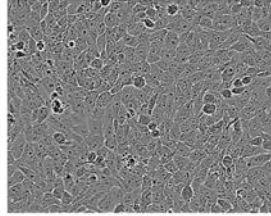

nc21, single stranded

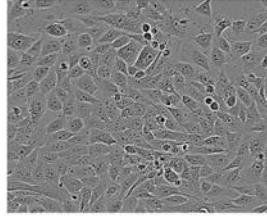

nc25, single stranded

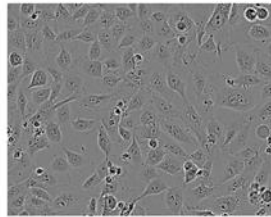

miR-222, single stranded

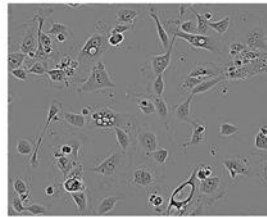

miR-222CUCU, single stranded

## Supplementary Figure 5

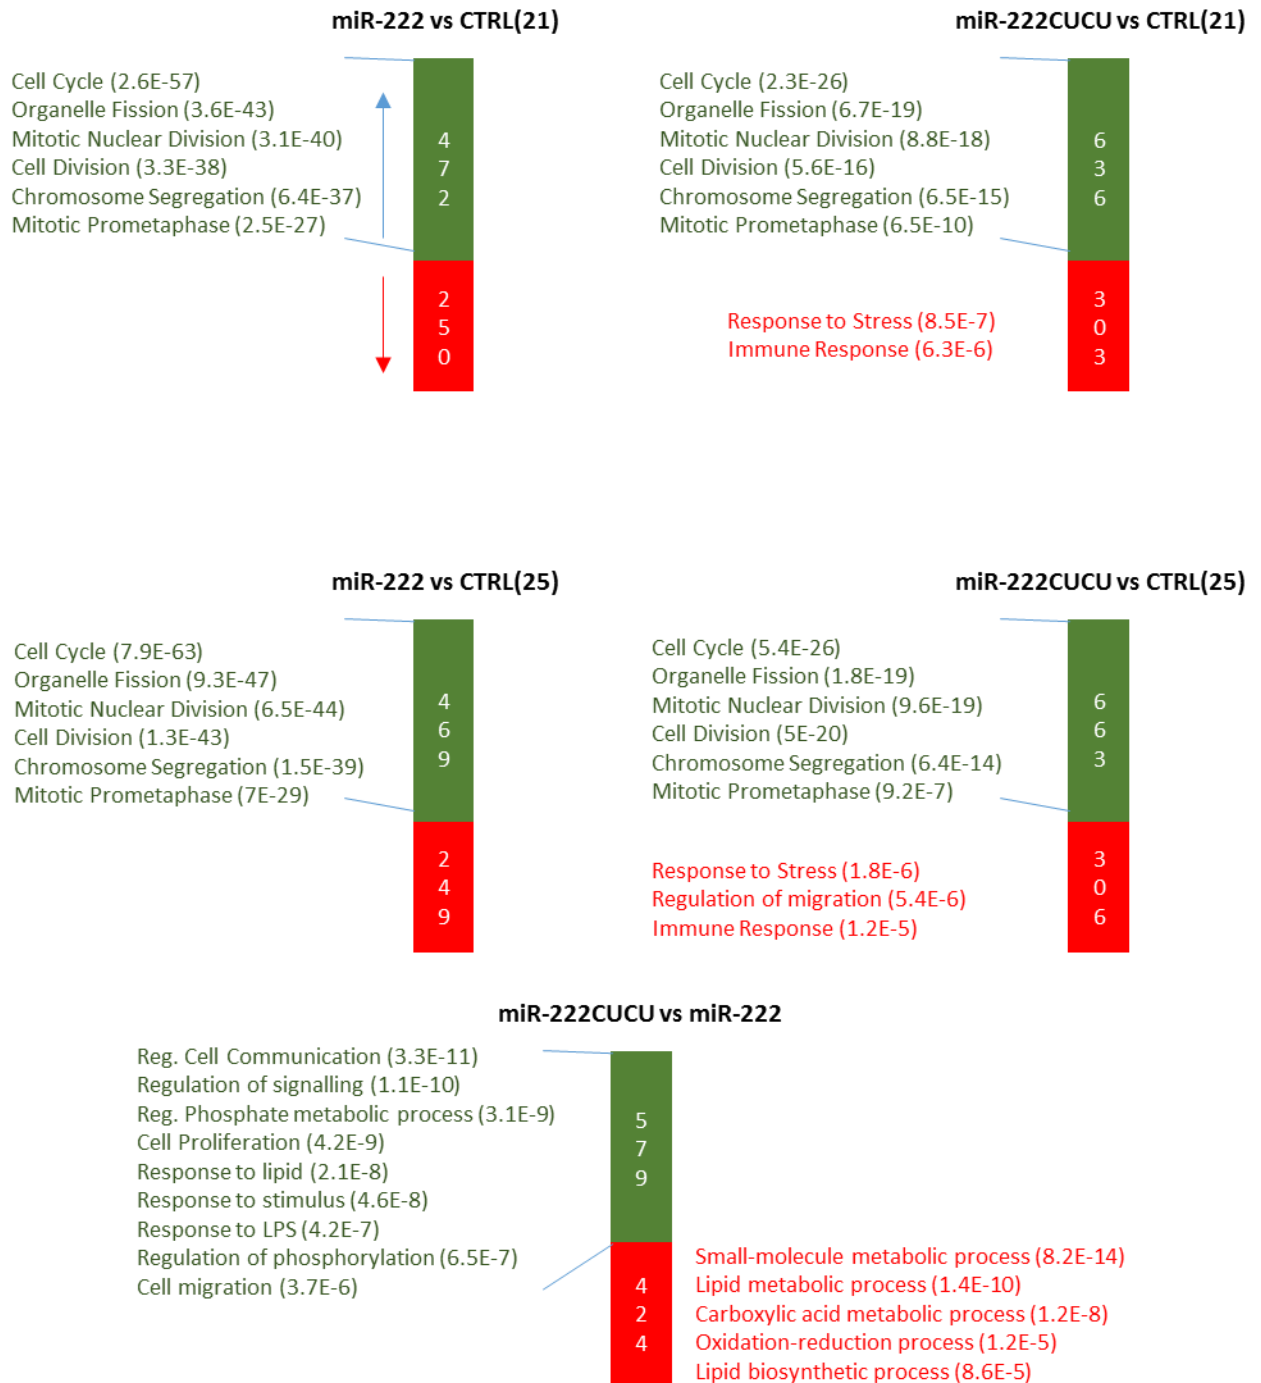

## Supplementary Figure 6

miR-222CUCU vs miR-222 (RNA-Seq)

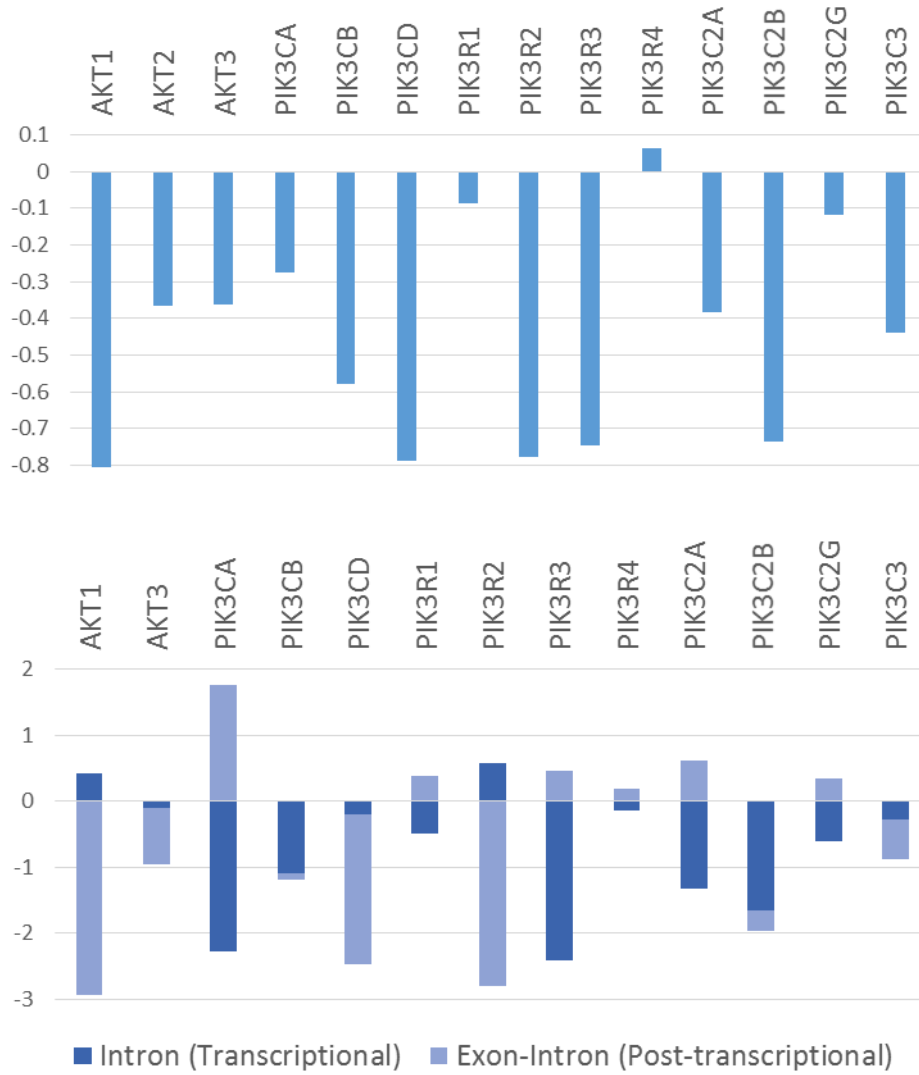

# Supplementary Figure 7

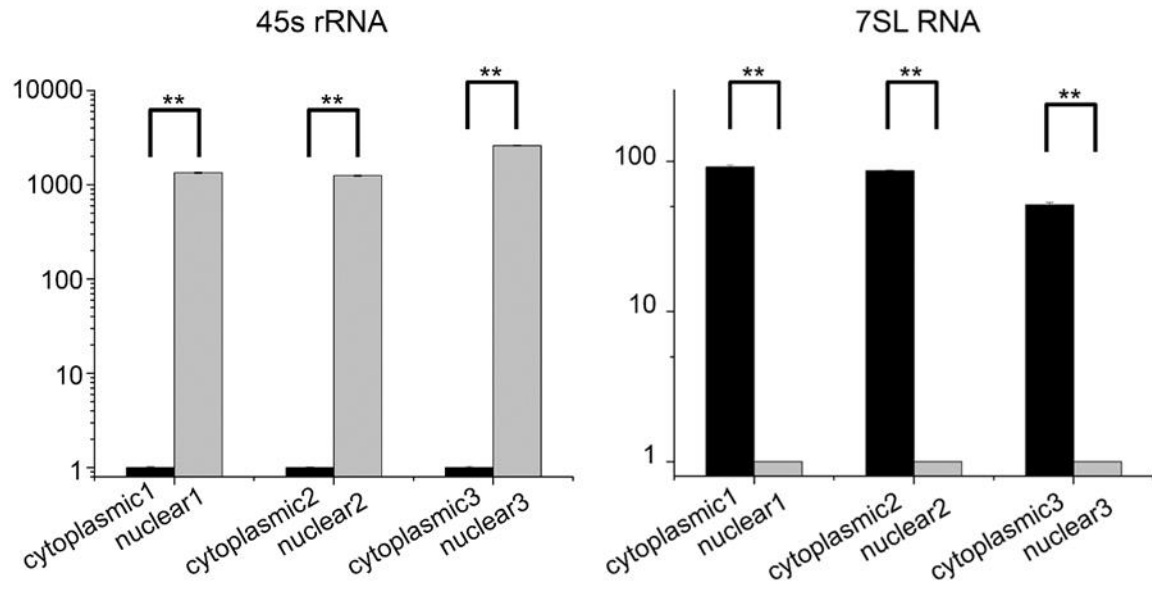



## Supplementary Table 1

| Pathway name                           | Overlapping genes | All genes | p value  | q value  |
|----------------------------------------|-------------------|-----------|----------|----------|
| Metabolism                             | 383               | 1427      | 1.32E-12 | 5.15E-09 |
| Nuclear Receptors Meta-Pathway         | 99                | 307       | 9.37E-08 | 0.00018  |
| Non-integrin membrane-ECM interactions | 22                | 42        | 2.3E-06  | 0.00304  |
| EGFR1                                  | 126               | 447       | 6.7E-06  | 0.0065   |
| Metabolism of lipids and lipoproteins  | 136               | 497       | 1.5E-05  | 0.0118   |
| Peroxisome - Homo sapiens              | 32                | 81        | 3E-05    | 0.0144   |
| Diseases of glycosylation              | 70                | 226       | 3.2E-05  | 0.0144   |
| Metabolism of carbohydrates            | 77                | 256       | 4.1E-05  | 0.0144   |
| TGF Beta Signaling Pathway             | 24                | 55        | 4.43E-05 | 0.0144   |
| Laminin interactions                   | 13                | 22        | 5.42E-05 | 0.0152   |
| Pre-NOTCH Processing in Golgi          | 9                 | 12        | 5.46E-05 | 0.0152   |
| Glucocorticoid Receptor Pathway        | 27                | 67        | 8.24E-05 | 0.0215   |
